# Supplementary material
Source: publisher figshare collection journal article supplement (https://frontiersin.figshare.com/ndownloader/files/21493863)
Supplement: Supplementary file [file 21493863]

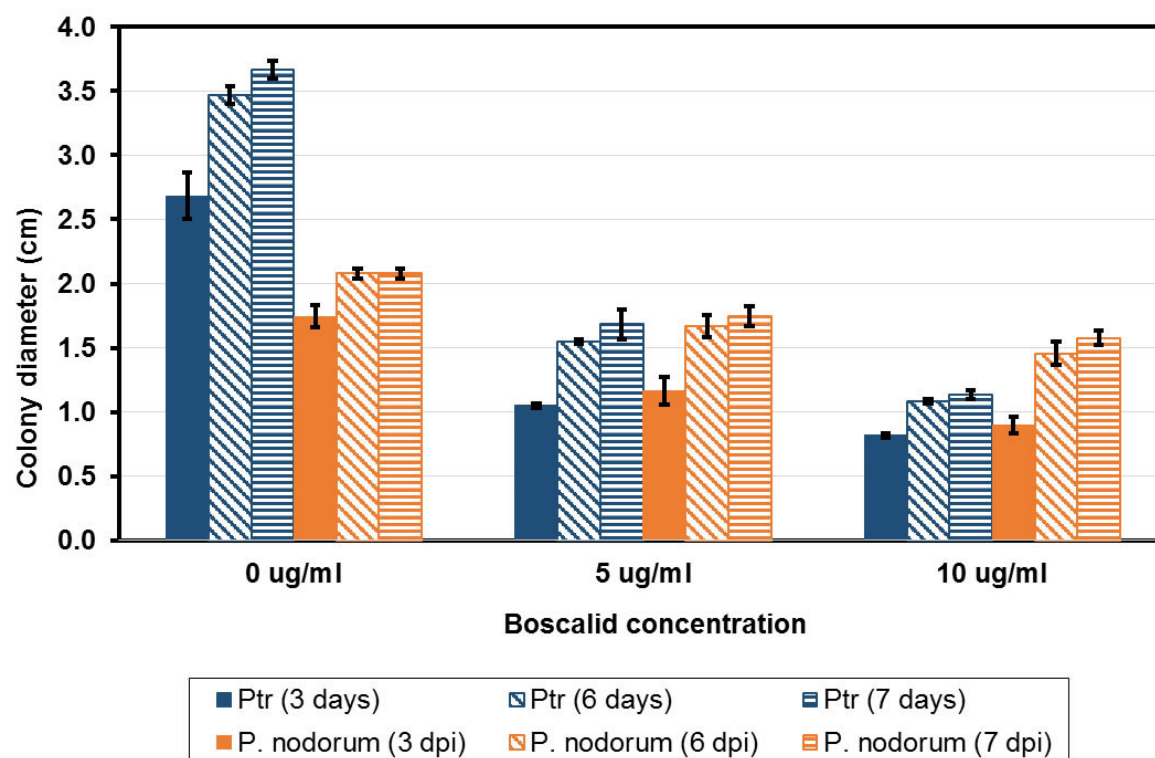

**Figure S1.** Radial growth measurements of *P. nodorum* and *Ptr* inoculated onto tap water agar with and without the fungicide boscalid.
